# Supplementary material
Source: MDPI journal article supplement (https://www.mdpi.com/2076-3417/12/15/7437)
Supplement: s1 [file s1 › applsci-1804819-supplementary.pdf]

## Supplementary material: On the relation of electrical field and evoked responses in Transcranial Magnetic Stimulation

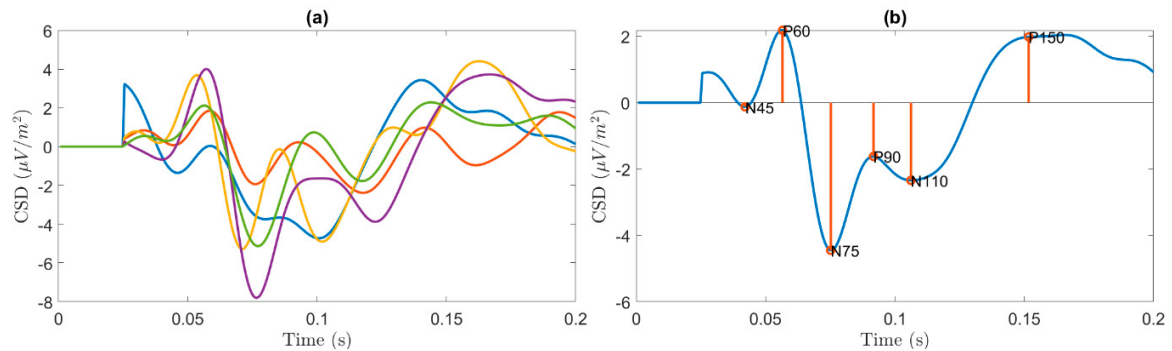

Figure S1. (a) ROI- averaged TEPs for the ROI of nine central channels and for individual subject for dataset A, and (b) the average across subjects TEP, along with identified components.

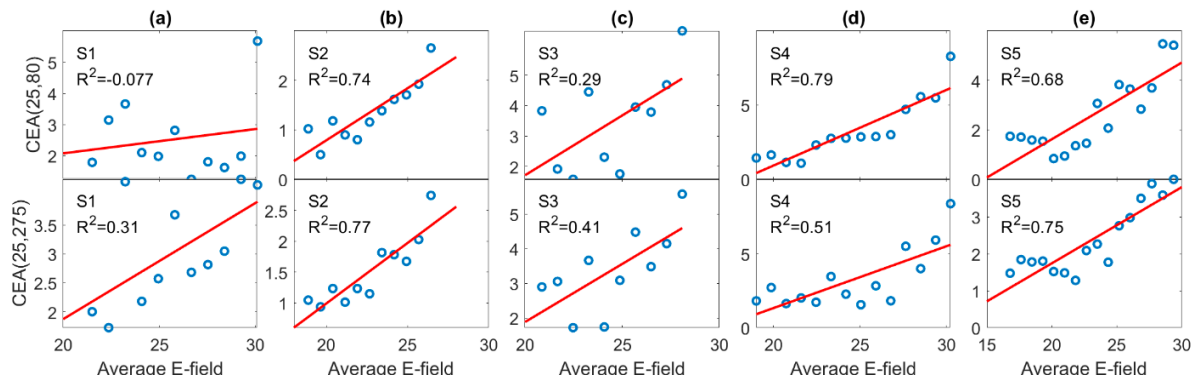

Figure S2. Linear model fits for the CEA measure value vs the average E-field for each subject separately. Top panels are for CEA(25,80) and bottom panels for CEA(25,275). The adjusted  $R^2$  for each model fit is shown inside each panel.

Table S1. Adjusted  $R^2$  and their statistical significance\* for the two CEAs and for individual subjects (figure 6 in main manuscript)

| Adjusted $R^2$ | S1           | S2           | S3           | S4           | S5           |
|----------------|--------------|--------------|--------------|--------------|--------------|
| CEA(25,80)     | -0.067(p=1)  | 0.84(p<0.01) | 0.38(p=0.05) | 0.92(p<0.01) | 0.80(p<0.01) |
| CEA(25,275)    | 0.32(p=0.06) | 0.84(p<0.01) | 0.47(p=0.02) | 0.69(p<0.01) | 0.84(p<0.01) |

\*Statistical significance based on t-test on the square root of  $R^2$  (assuming equivalence to Pearsons' correlation)

Table S2. Adjusted  $R^2$  for the two CEAs and for different model fits

| CEA(25,80) $R^2$  | vs average E-field | vs SI | vs %LT      |
|-------------------|--------------------|-------|-------------|
| Linear            | 0.47               | 0.35  | 0.41        |
| Exponential       | <b>0.54*</b>       | 0.41  | 0.47        |
| Sigmoid           | <b>0.53</b>        | 0.39  | <b>0.51</b> |
| CEA(25,275) $R^2$ | vs average E-field | vs SI | vs %LT      |
| Linear            | <b>0.50</b>        | 0.35  | 0.33        |
| Exponential       | <b>0.58*</b>       | 0.41  | 0.36        |
| Sigmoid           | <b>0.58*</b>       | 0.43  | 0.39        |
